# Supplementary material
Source: Springer Nature journal article supplement (https://www.springermedizin.de/resource/supplementary/13229_2013_85_MOESM4_ESM.pdf/9676140)

### BRAF-AS

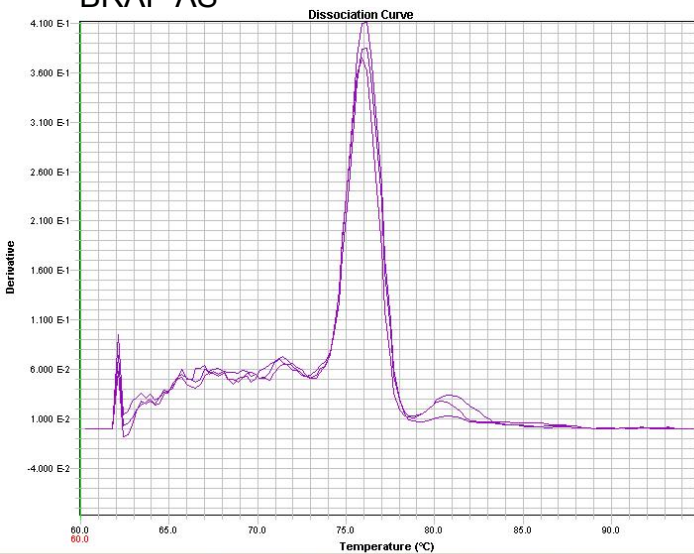

### CACNA1C-AS

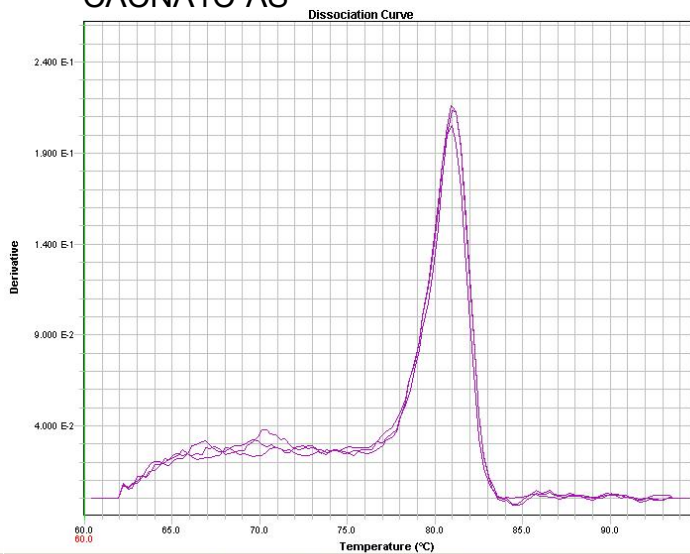

### CACNA1C-AS2

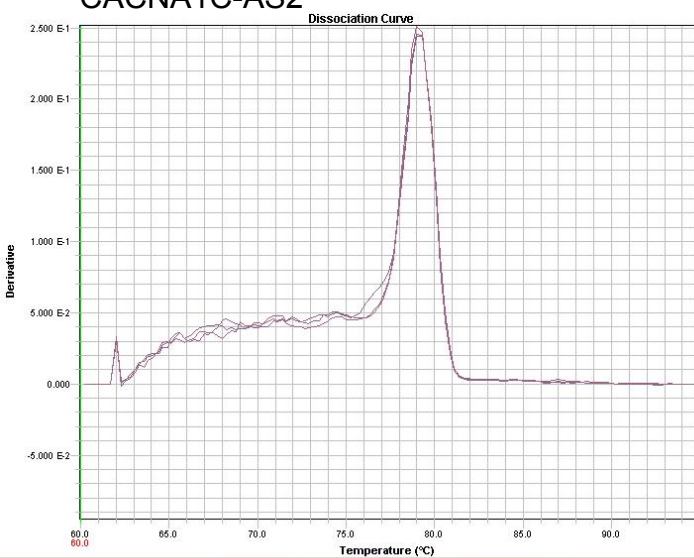

### CNTNAP2-AS

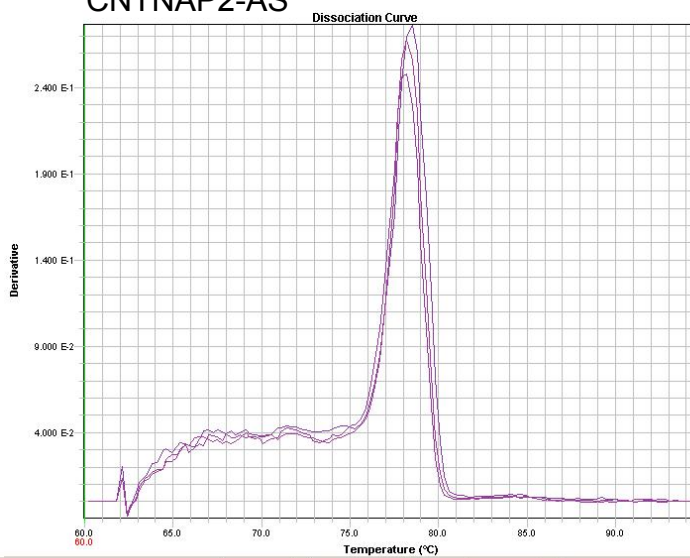

### DHCR7-AS

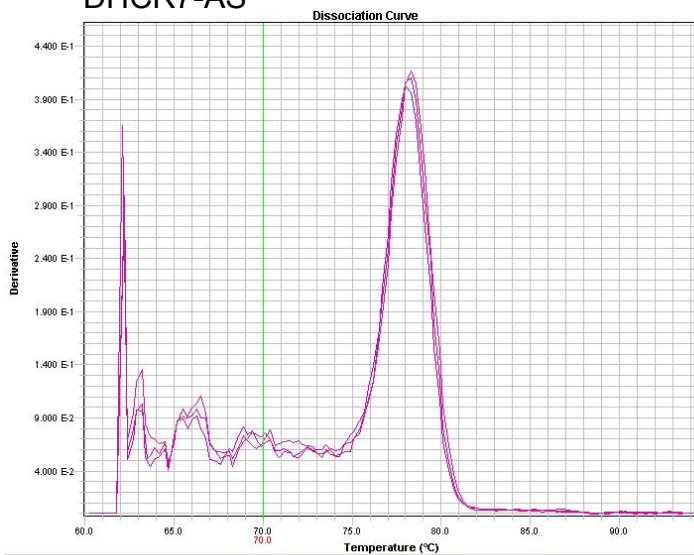

### FOXG1-AS

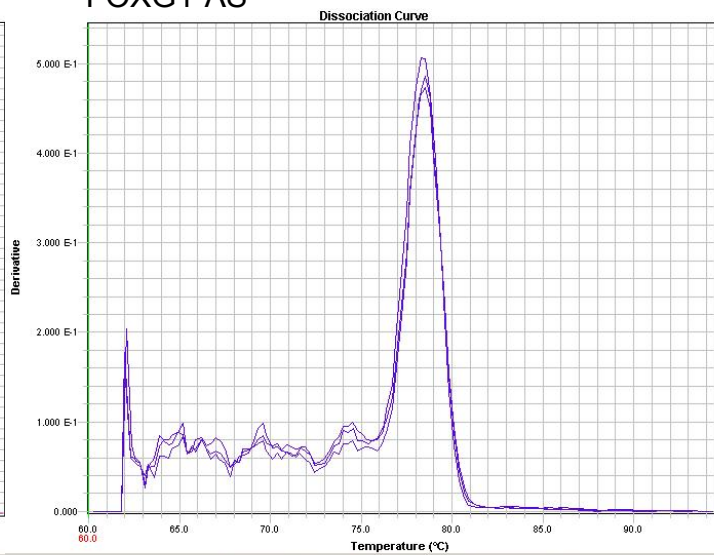

### FOXP1-AS

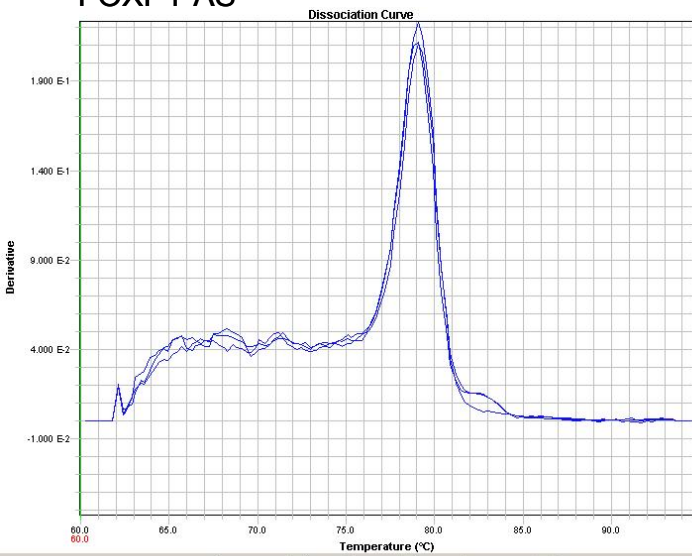

### LAMP2-AS

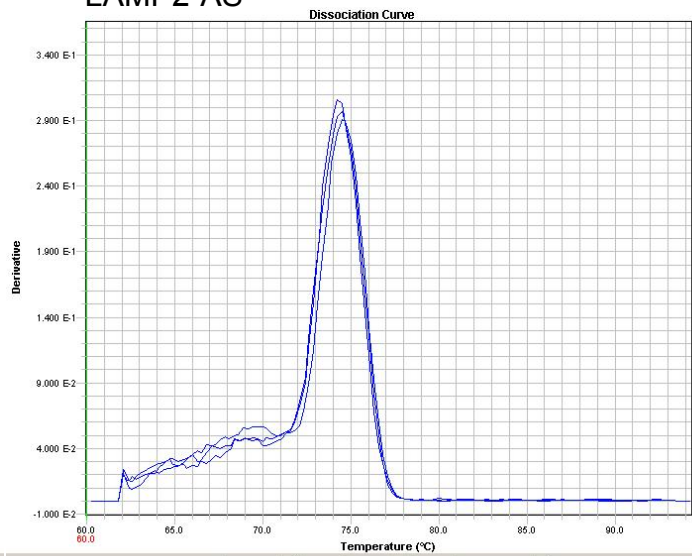

### MDB5-AS

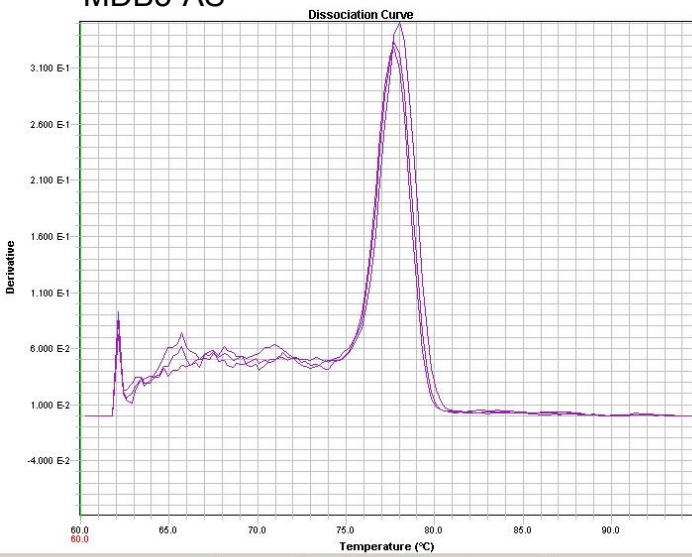

### NHS-AS

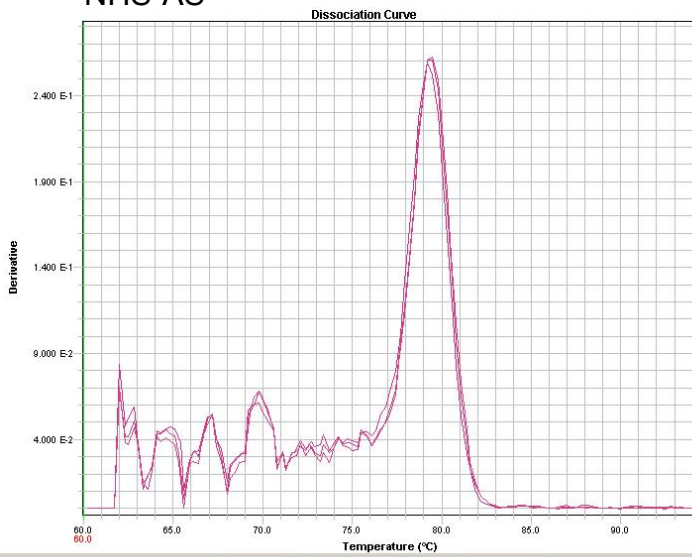

### NIPBL-AS

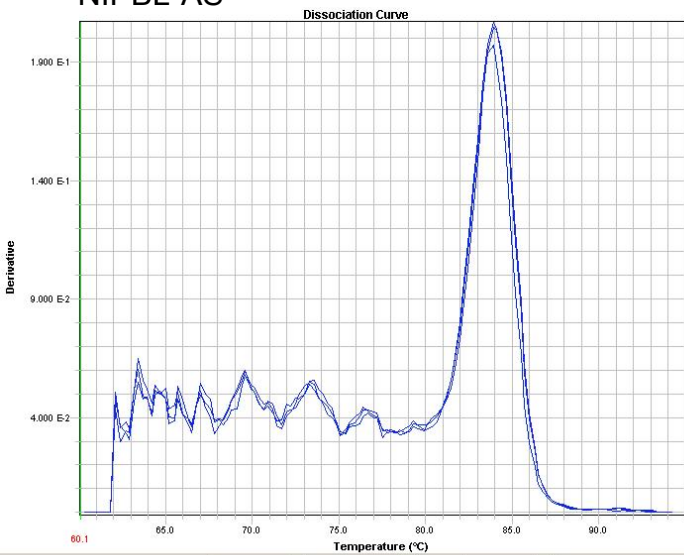

### PQBP-AS

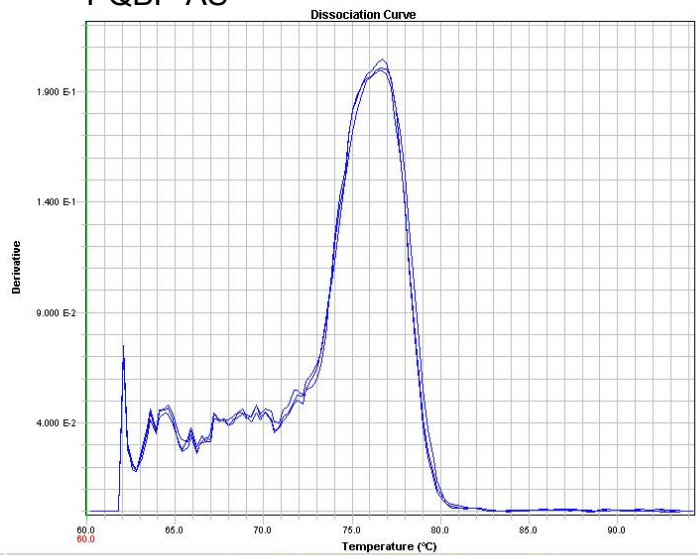

# PTEN-AS

Dissociation Curve

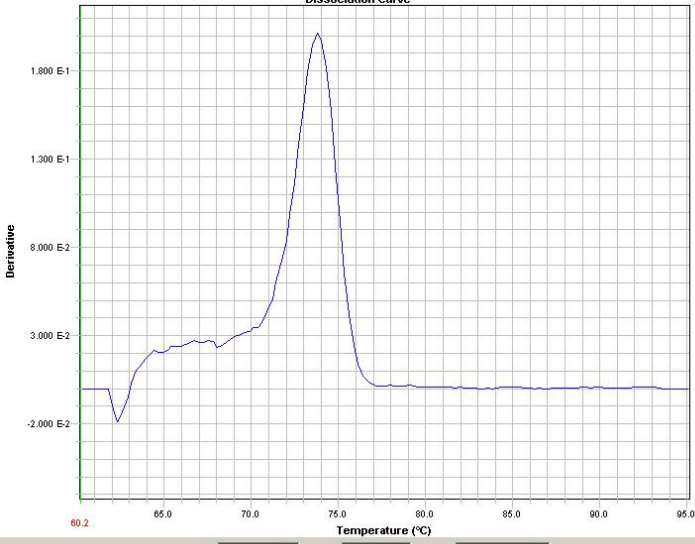

# SYNGAP1-AS

Dissociation Curve

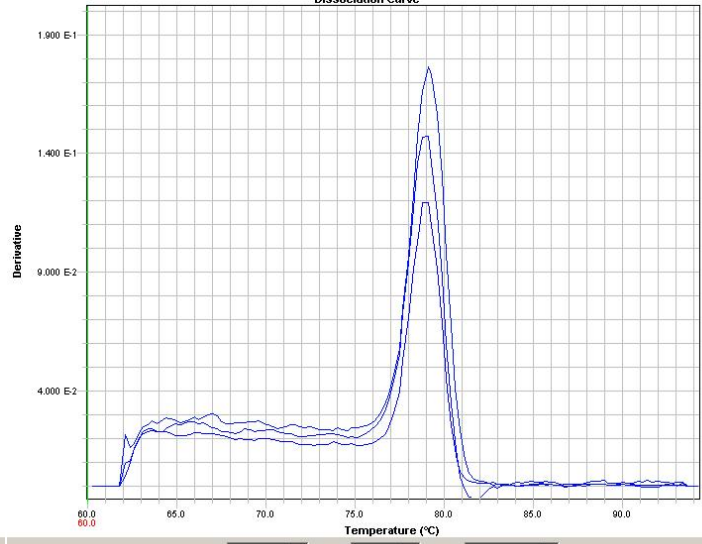

# PTEN-AS

Dissociation Curve

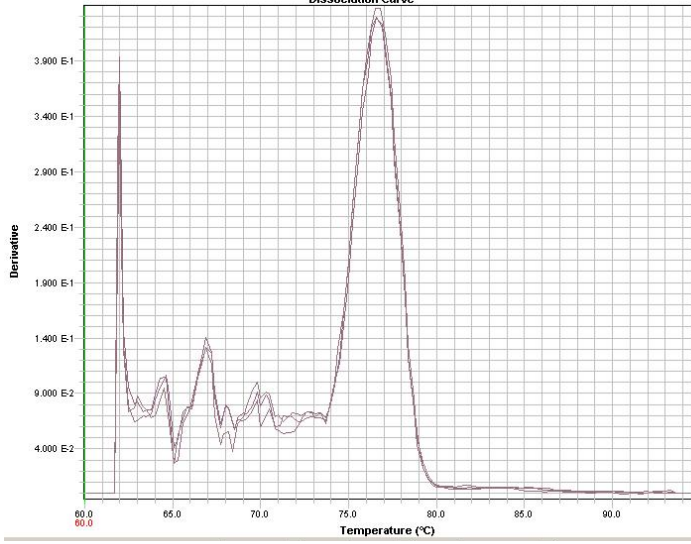

# ZNF-AS

Dissociation Curve

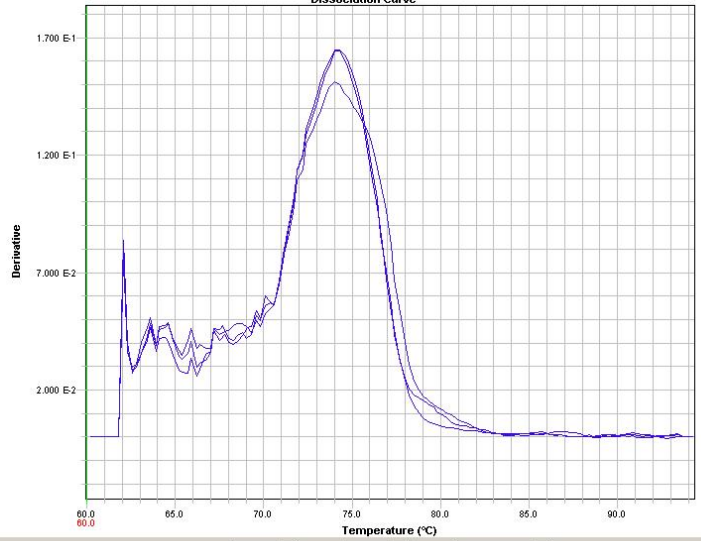

Supplement: MOESM4 [file 9676140]
